# Supplementary material for: Vernal Pool Amphibian Inventories in Temperate Forests of Eastern North America: Can Environmental DNA Replace Traditional Methods?
Source: Preprints.org preprint supplement (doi:10.20944/preprints202307.1388.v1), 2023-07-20

Figure S1: zOTUs accumulation curves of the merged CO1 metabarcodes (176 and 455) by number of processed filters. zOTUs were merged at the species level. Transparent areas correspond to the 95% confidence interval, estimated from 1000 random permutations. The dashed line represents the total number of Amphibia species detected using eDNA metabarcoding.


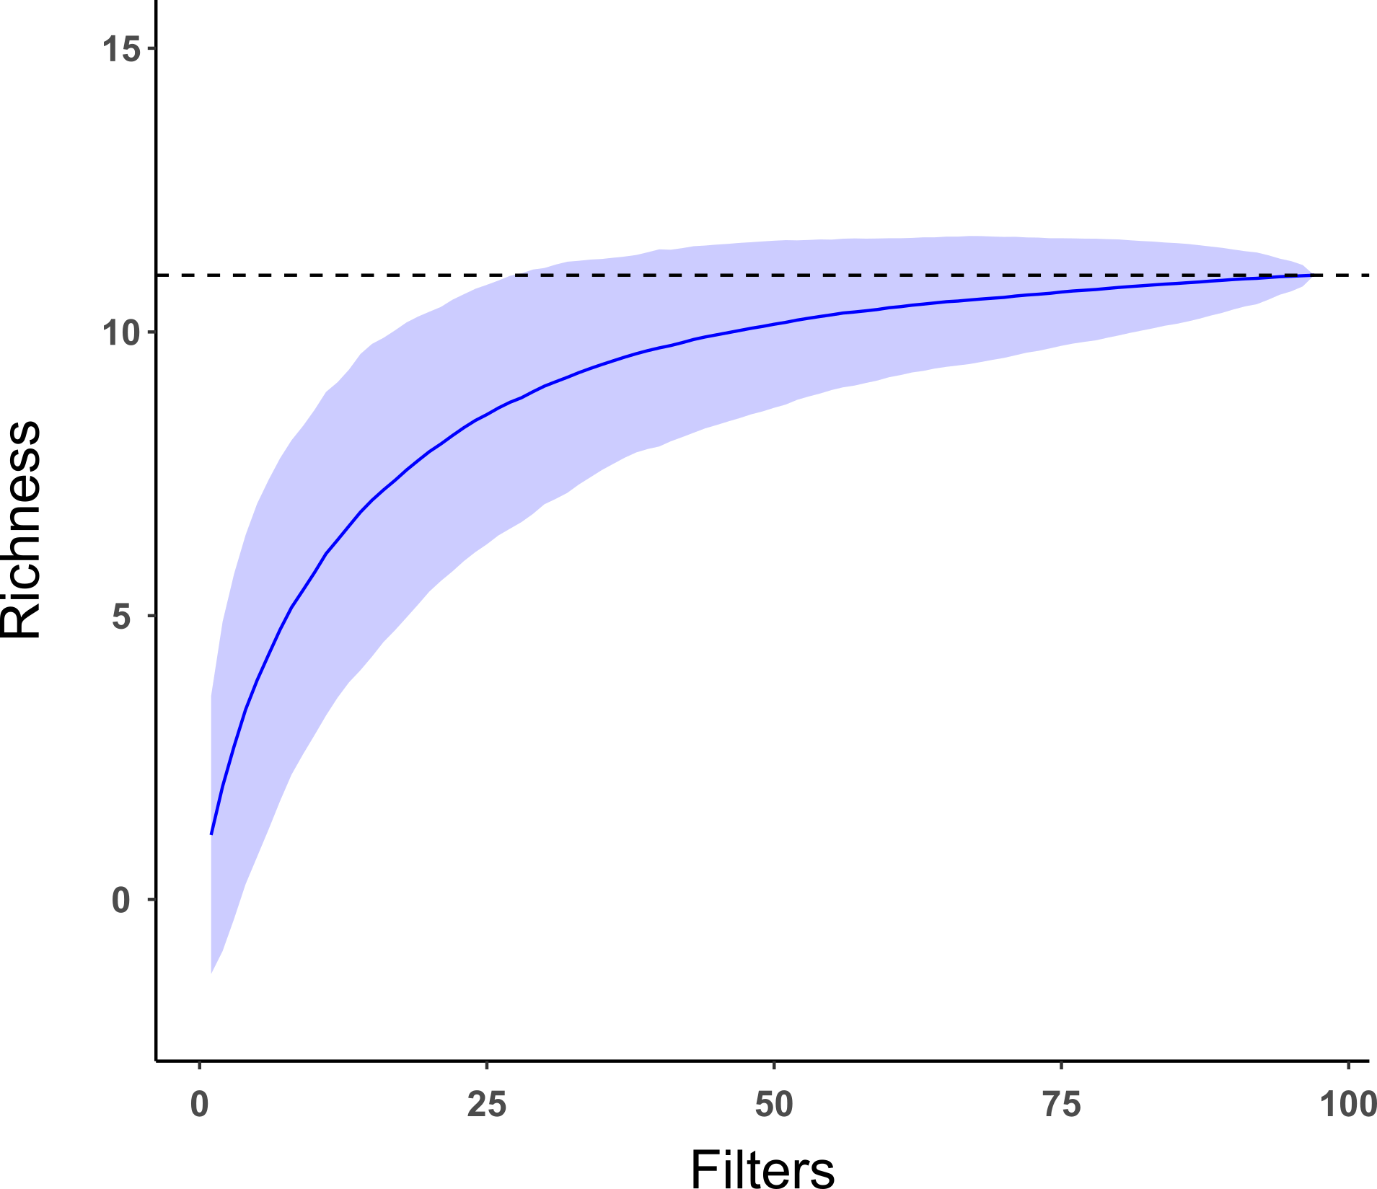

Supplement: Supplementary file 1 [file Figure S1.docx]
