# Supplementary material for: Vernal Pool Amphibian Inventories in Temperate Forests of Eastern North America: Can Environmental DNA Replace Traditional Methods?
Source: Preprints.org preprint supplement (doi:10.20944/preprints202307.1388.v1), 2023-07-20
Supplement: Supplementary file 2 [file Table S1.xlsx]

## Sheet: Feuil1
			Supplementary material 1: Summary of sampling effort per inventory method in each vernal pool sampled for this study. All sampling occurred in 2019; date format: dd-mm.
	eDNA sampling period	Total eDNA filters after lab processing	Accoustic Reciever period	Gee Trap period	active search period
EC5V	09/05 - 20/06	9	10/05 - 02/06	09/05 - 15/05	09/05 - 15/05
EVC1	23/05 - 18/06	8	15/05 - 02/06	27/05 -31/05	27/05 -31/05
EVC4	22/05 - 18/06	8	15/05 - 02/06	27/05 -31/05	27/05 -31/05
EV99	22/05 - 18/06	8	12/05 - 02/06	11/05 - 15/05 and 27/05 -31/05	11/05 - 15/05 and 27/05 -31/05
EC13V	22/05 - 18/06	8	12/05 - 02/06	11/05 - 15/05 and 27/05 -31/05	11/05 - 15/05 and 27/05 -31/05
EVC5	22/05 - 18/06	7	12/05 - 02/06	11/05 - 15/05 and 27/05 -31/05	11/05 - 15/05 and 27/05 -31/05
HP3	09/05 - 20/06	9	10/05 - 02/06	09/05 - 15/05	09/05 - 15/05
ET1V	23/05 - 12/06	6	18/05 - 02/06	10/06 - 14/06	10/06 - 14/06
EV98	23/05 - 18/06	8	15/05 - 02/06	27/05 -31/05	27/05 -31/05
site 2	09/05 - 19/06	8	10/05 - 02/06	09/05 - 15/05	09/05 - 15/05
EVP4	21/05 - 17/06	8	18/05 - 02/06	27/05 -31/05	27/05 -31/05
EVC13	09/05 - 19/06	8	10/05 - 02/06	09/05 - 15/05	09/05 - 15/05
