# Supplementary material for: Vernal Pool Amphibian Inventories in Temperate Forests of Eastern North America: Can Environmental DNA Replace Traditional Methods?
Source: Preprints.org preprint supplement (doi:10.20944/preprints202307.1388.v1), 2023-07-20
Supplement: Supplementary file 3 [file Table S2.xlsx]

## Sheet: Sheet1
Supplementary material 2: Presence-absence of each amphibian species per sampled vernal pool using eDNA and traditional sampling. Per species, the left number indicates a detection using eDNA metabarcoding at that vernal pool while right number indicates a detection using the aggregation of the three traditional inventory methods used in this study. Amphibian species are sorted in alphabetical or…
Order	Family		Species	EC5V	EC13V	ET1V	EV98	EV99	EVC1	EVC4	EVC5	EVC13	EVP4	HP3	site2
Anura	Bufonidae	Anaxyrus americanus*		1/1	0/0	0/0	0/0	0/0	1/0	0/0	0/0	1/0	1/0	0/0	0/0
	Hylidae	Hyla versicolor*		1/0	0/0	1/0	0/0	0/0	0/0	0/0	1/0	0/0	1/0	0/0	0/0
		Pseudacris crucifer*		0/1	0/1	0/1	1/0	0/1	0/1	1/0	0/1	0/1	1/1	0/1	1/1
		Ps. maculata		0/0	0/0	0/0	0/0	0/0	0/0	0/0	0/0	0/0	0/0	0/0	0/0
		Ps. triseriata		0/0	0/0	0/0	0/0	0/0	0/0	0/0	0/0	0/0	0/0	0/0	0/0
	Ranidae	Lithobates catesbeianus*		0/0	0/0	0/0	1/0	0/0	1/0	1/0	0/0	1/1	0/0	0/0	0/0
		L. clamitans*		1/1	1/1	1/1	1/1	1/1	1/1	1/1	1/1	1/1	1/1	1/1	1/1
		L. palustris*		0/0	0/0	0/0	0/0	0/0	0/0	0/0	0/0	1/0	0/0	0/0	0/0
		L. pipiens		0/0	0/0	0/0	0/0	0/0	0/0	0/0	0/0	0/1	0/0	0/0	0/0
		L. septentrionalis*		0/0	0/0	0/0	0/0	0/0	0/0	0/0	0/0	0/0	0/0	0/0	0/0
		L. sylvaticus		0/1	0/0	1/1	0/0	0/0	1/0	0/1	1/1	0/0	0/0	1/1	0/0
Urodela	Ambystomatidae	Ambystoma laterale		0/0	0/0	0/0	0/0	0/0	0/0	1/0	1/0	0/0	1/0	0/0	0/0
		Am. maculatum*		0/1	0/0	1/0	1/0	0/1	1/0	1/0	1/0	0/0	1/0	1/0	1/0
	Plethodontidae	Desmognathus fuscus		0/0	0/0	0/0	0/0	0/0	0/0	0/0	0/0	0/0	0/0	0/0	0/0
		D. ochrophaeus		0/0	0/0	0/0	0/0	0/0	0/0	0/0	0/0	0/0	0/0	0/0	0/0
		Eurycea bislineata*		0/0	0/0	0/0	0/0	0/0	0/0	0/0	0/0	0/0	0/0	0/0	0/0
		Gyrinophilus porphyriticus		0/0	0/0	0/0	0/0	0/0	0/0	0/0	0/0	0/0	0/0	0/0	0/0
		Hemidactylium scutatum*		0/0	0/0	0/0	0/0	0/0	0/0	0/0	0/0	0/1	0/0	0/0	0/0
		Plethodon cinereus*		0/1	0/1	0/1	0/1	0/1	0/1	0/1	1/1	0/1	0/1	1/1	0/1
	Proteidae	Necturus maculosus		0/0	0/0	0/0	0/0	0/0	0/0	0/0	0/0	0/0	0/0	0/0	0/0
	Salamandridae	Notophthalmus viridescens*		0/0	1/0	1/0	1/0	0/0	0/0	1/1	1/1	0/1	0/1	0/0	0/0
